# Supplementary material for: Impact of a quality improvement project to reduce the rate of obstetric anal sphincter injury: a multicentre study with a stepped‐wedge design
Source: PubMed Central journal article supplement — BJOG. 2020 Aug 9;128(3):584–92. doi: 10.1111/1471-0528.16396 (PMC7818460; doi:10.1111/1471-0528.16396), 2020-08-09
Supplement: BJO-128-584-s001.pdf [file BJO-128-584-s001.pdf]

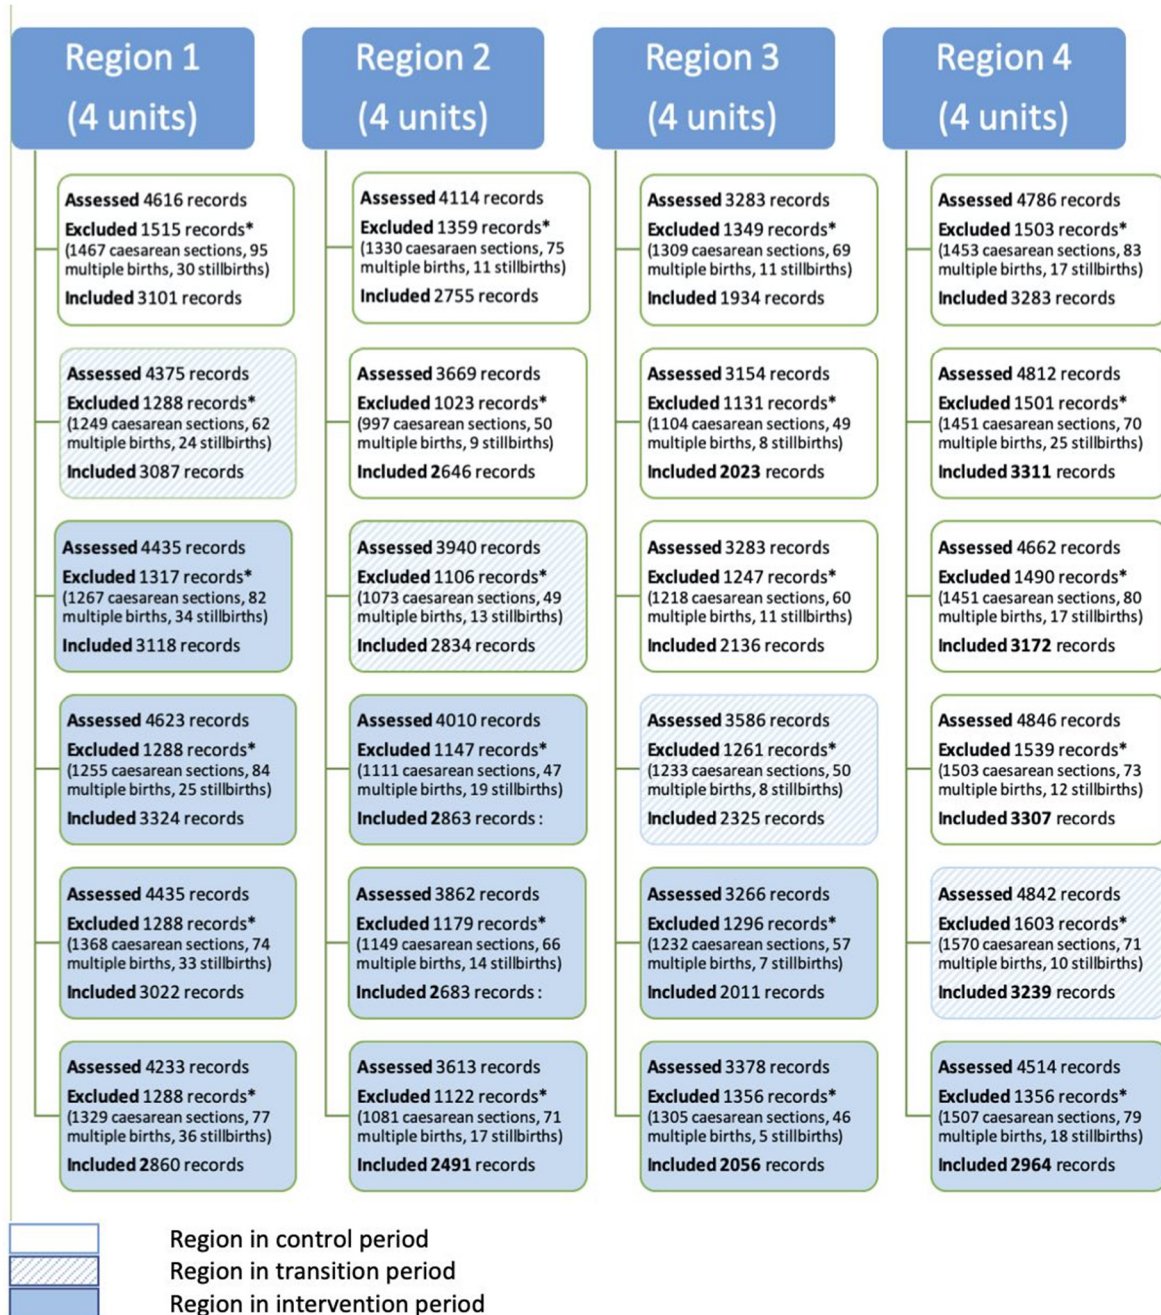

\* Records may fail multiple inclusion criteria (e.g. multiple births delivered by caesarean section), therefore the total number of records excluded is less than sum of records excluded for each criteria

Figure S1. Consort flow diagram.
